# Supplementary material for: Spatial Heterogeneity of Combined Factors Affecting Vegetation Greenness Change in the Yangtze River Economic Belt from 2000 to 2020
Source: MDPI journal article supplement (doi:10.3390/rs15245693), 2023-12-12
Supplement: s1 [file s1]

**Table S1.** Grading standards of influencing factors

| categories | Pre/<br>0.1mm | Tem/<br>0.1℃ | wind speed/<br>m/s | PM2.5/<br>ug/m <sup>3</sup> | PD/<br>People/km <sup>2</sup> | CO <sub>2</sub> emissions/<br>ton | LULC/<br>types | DEM/<br>m | Aspect/<br>°  | Slope/<br>° |
|------------|---------------|--------------|--------------------|-----------------------------|-------------------------------|-----------------------------------|----------------|-----------|---------------|-------------|
| 1          | 3947~5782     | -90~36       | 0.17~0.61          | 13.23~19.83                 | 0~616                         | 0                                 | Cropland       | -143~219  | -1~37.07      | 0~1.55      |
| 2          | 5782~6703     | 36~59        | 0.61~0.82          | 19.83~24.73                 | 616~4315                      | 0~9646                            | Forest         | 219~533   | 37.07~77.96   | 1.55~3.87   |
| 3          | 6703~7597     | 59~82        | 0.82~1.01          | 24.73~29.44                 | 4315~9862                     | 9646~31693                        | Shrub          | 533~874   | 77.96~117.45  | 3.87~6.35   |
| 4          | 7597~8790     | 82~110       | 1.01~1.20          | 29.44~33.96                 | 9862~17874                    | 31693~63385                       | Grassland      | 874~1247  | 117.45~156.93 | 6.35~8.99   |
| 5          | 8790~10584    | 110~141      | 1.20~1.44          | 33.96~38.48                 | 17874~29585                   | 63385~85432                       | Barren         | 1247~1657 | 156.93~197.82 | 8.99~11.77  |
| 6          | 10584~15812   | 141~169      | 1.44~3.17          | 38.48~42.81                 | 29585~46844                   | 85432~99212                       | Impervious     | 1657~2090 | 197.82~238.71 | 11.77~14.87 |
| 7          |               | 169~192      |                    | 42.81~47.52                 | 46844~73963                   | 99212~144684                      | Water          | 2090~2595 | 238.71~278.20 | 14.87~18.44 |
| 8          |               | 192~212      |                    | 47.52~61.64                 | 73963~157789                  | 144684~231494                     | Snow/Ice       | 2595~3207 | 278.20~317.68 | 18.44~23.08 |
| 9          |               | 212~231      |                    |                             |                               | 231494~352753                     | Wetland        | 3207~3803 | 317.68~359.99 | 23.08~39.66 |
| 10         |               | 231~247      |                    |                             |                               |                                   |                | 3803~4332 |               |             |
| 11         |               | 247~274      |                    |                             |                               |                                   |                | 4332~6448 |               |             |

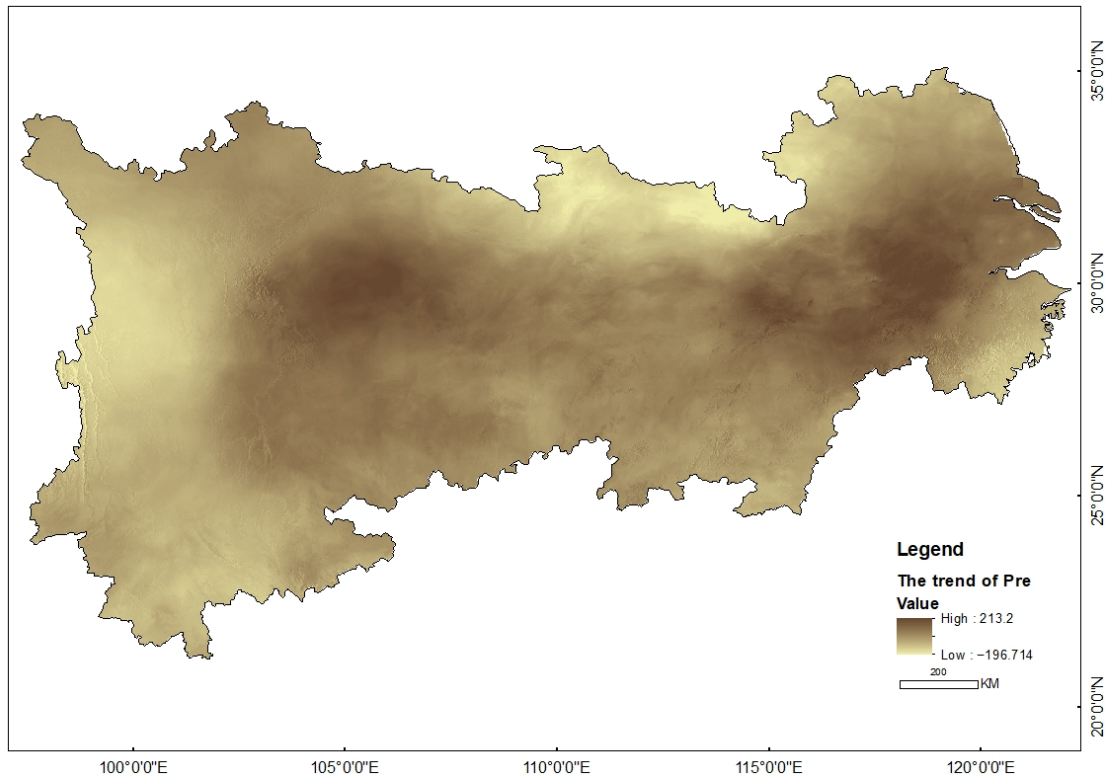

**Figure S1.** The trend of pre in the study area (2000-2020).

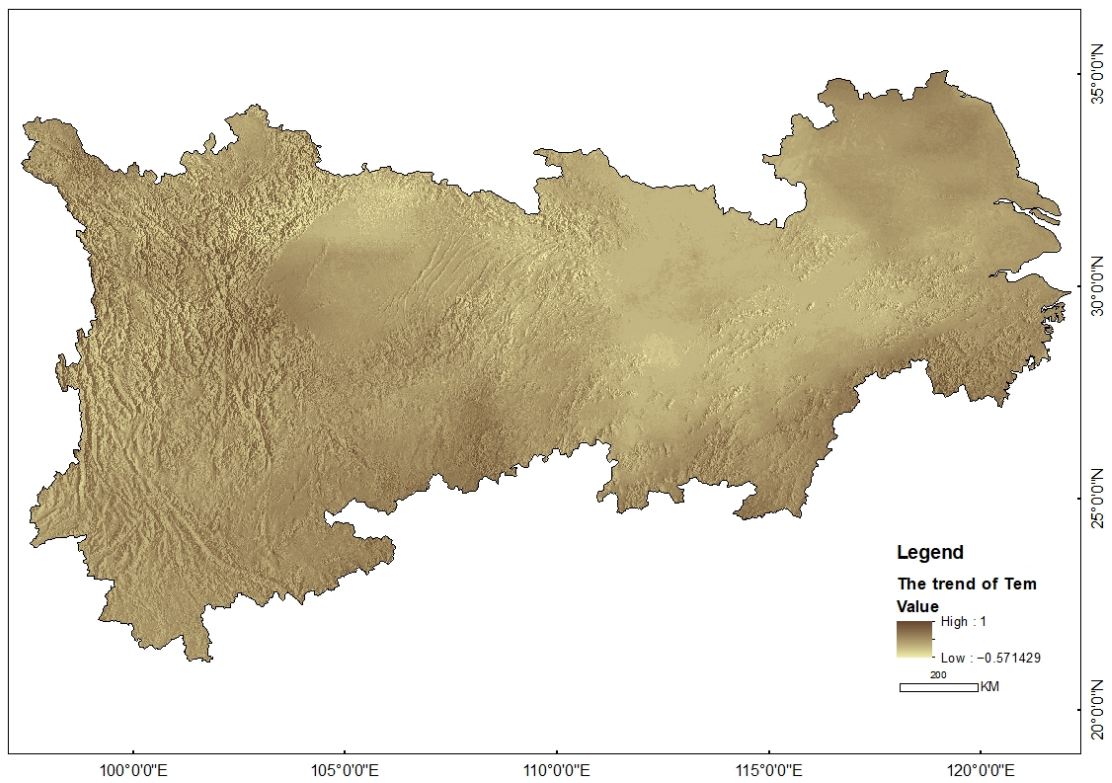

**Figure S2.** The trend of tem in the study area (2000-2020).

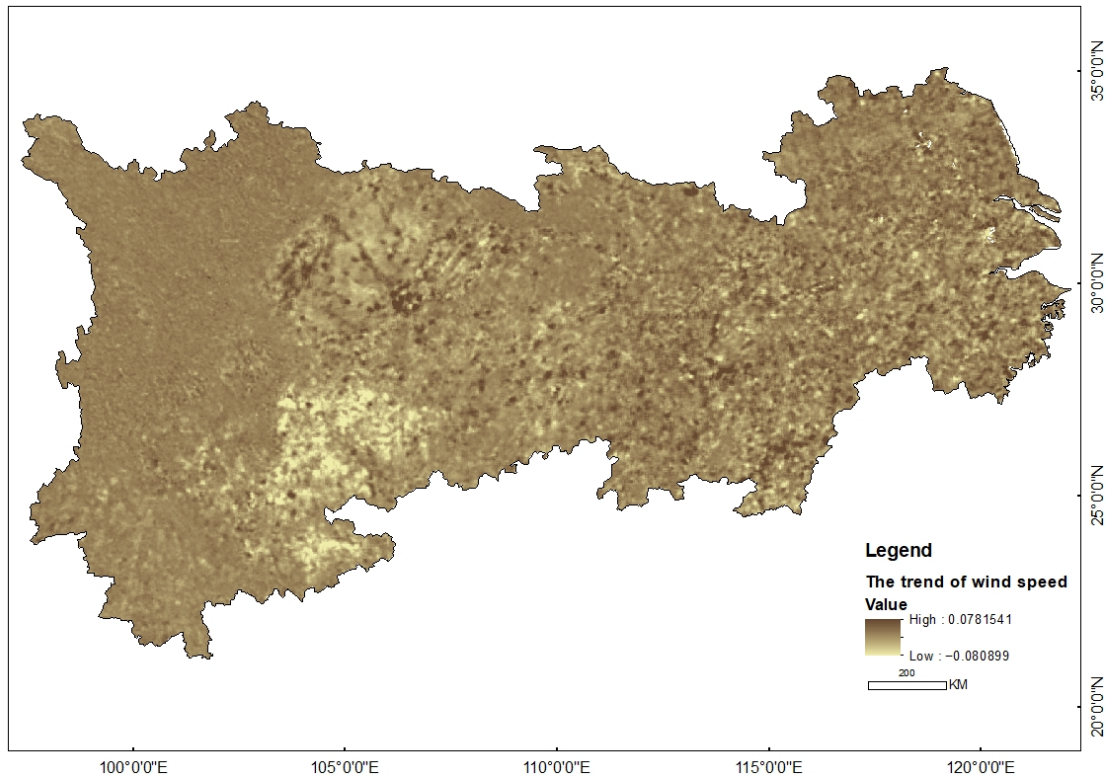

**Figure S3.** The trend of wind speed in the study area (2000-2020).

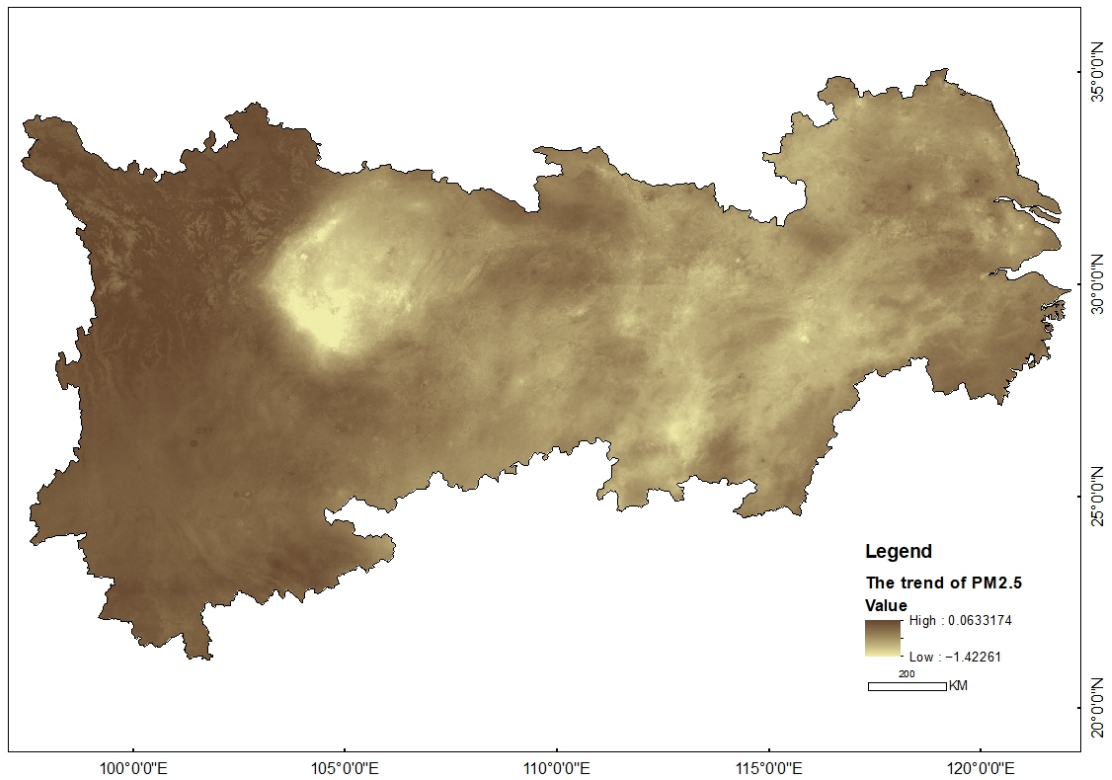

**Figure S4.** The trend of PM2.5 in the study area (2000-2020).

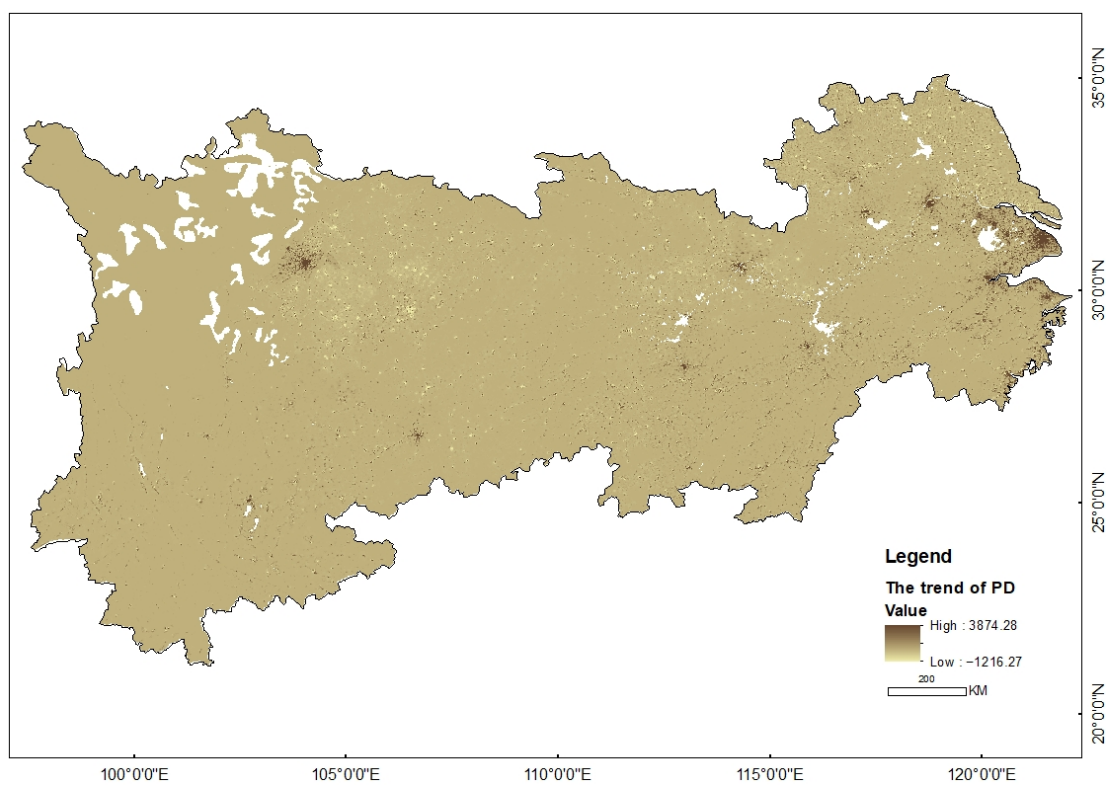

**Figure S5.** The trend of PD in the study area (2000-2020).

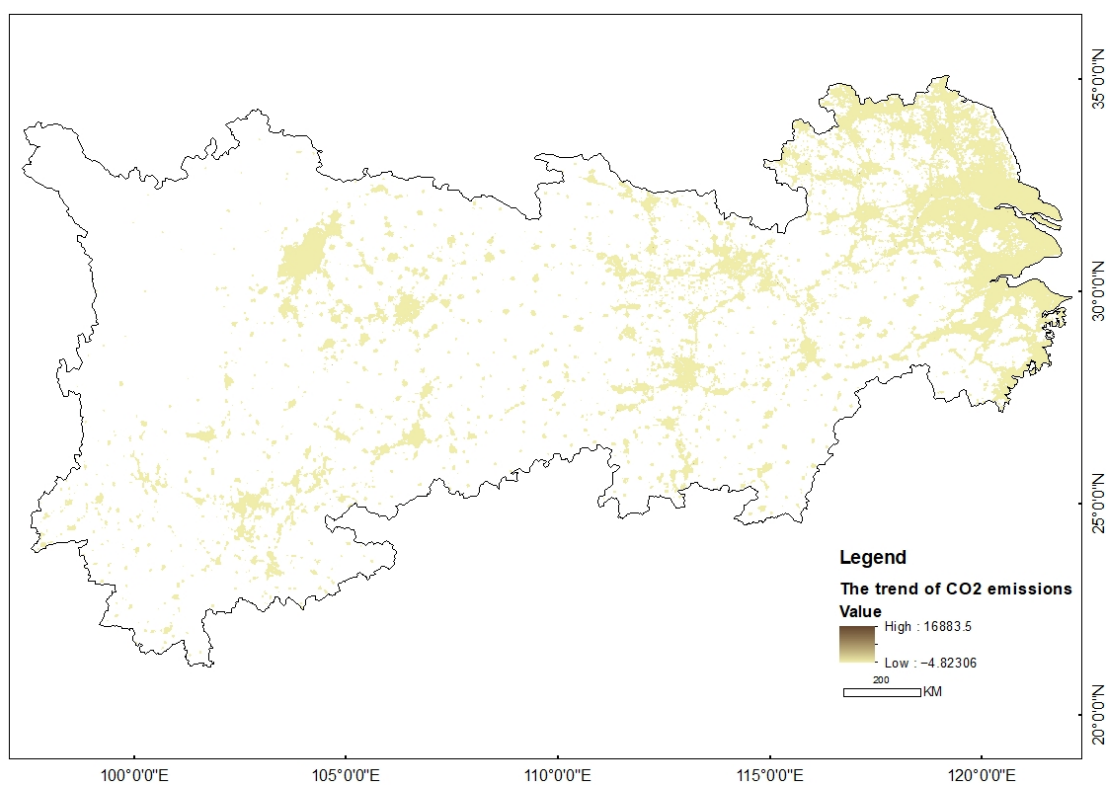

**Figure S6.** The trend of CO<sub>2</sub> emission in the study area (2000-2020).



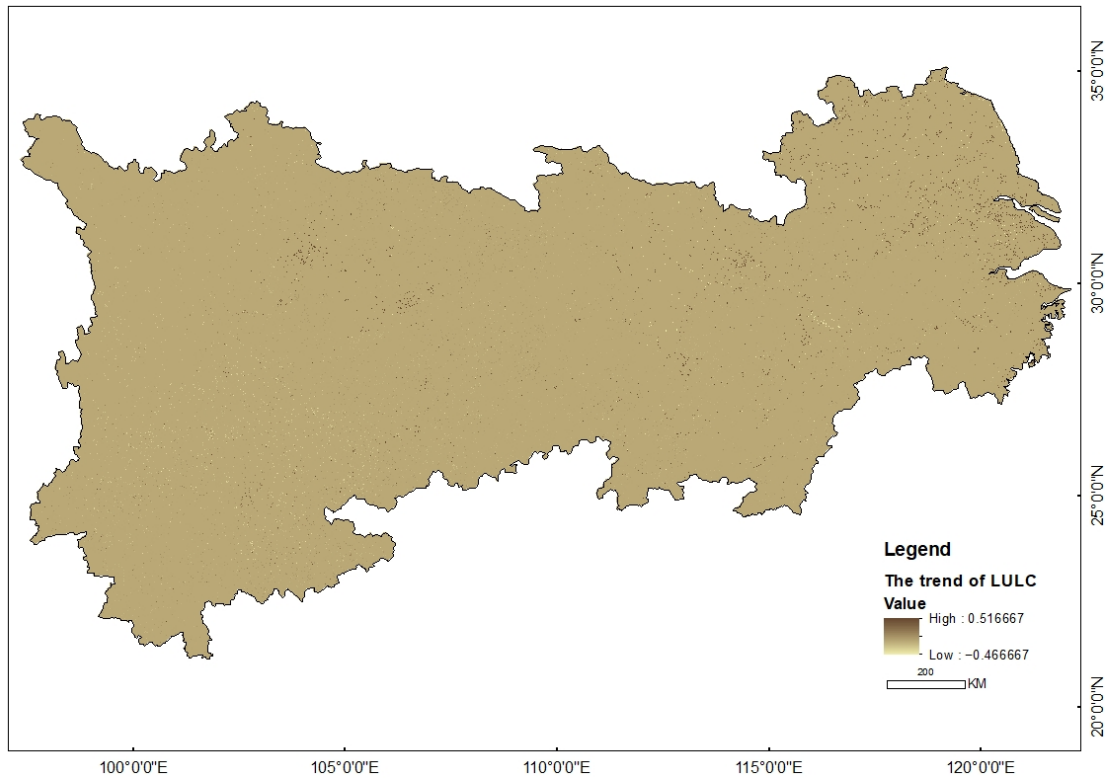

**Figure S7.** The trend of LULC in the study area (2000-2020).

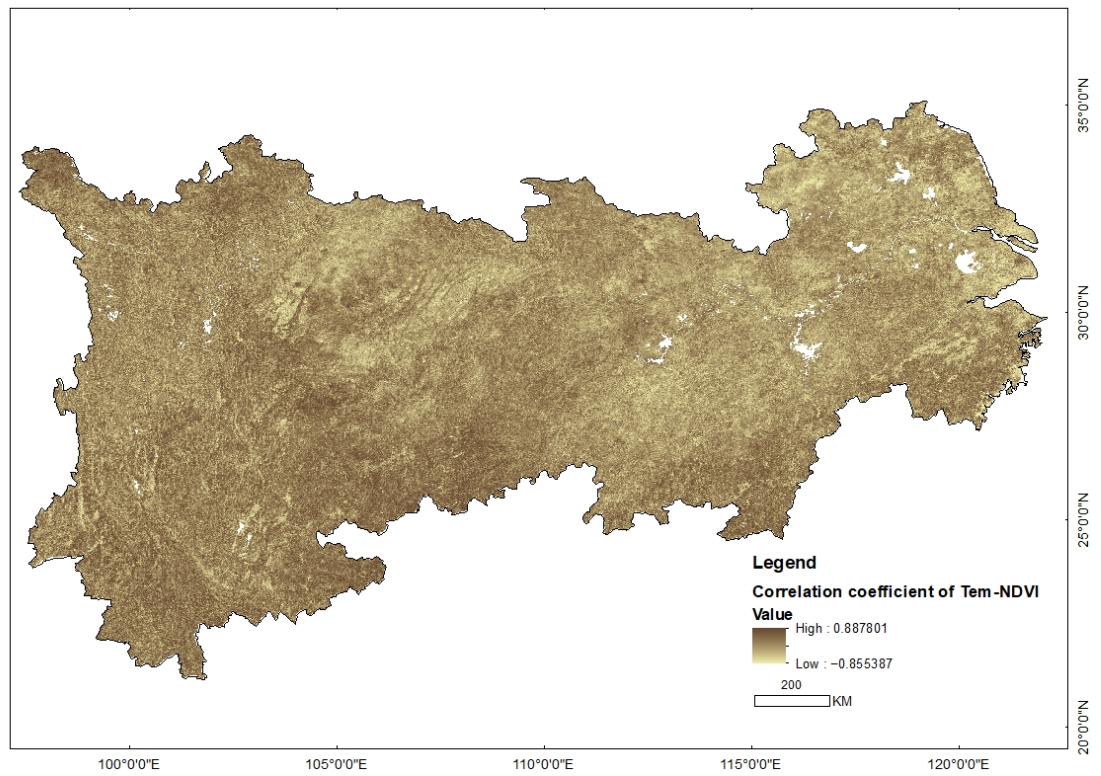

**Figure S8.** Correlation coefficients of tem-NDVI (2000-2020).

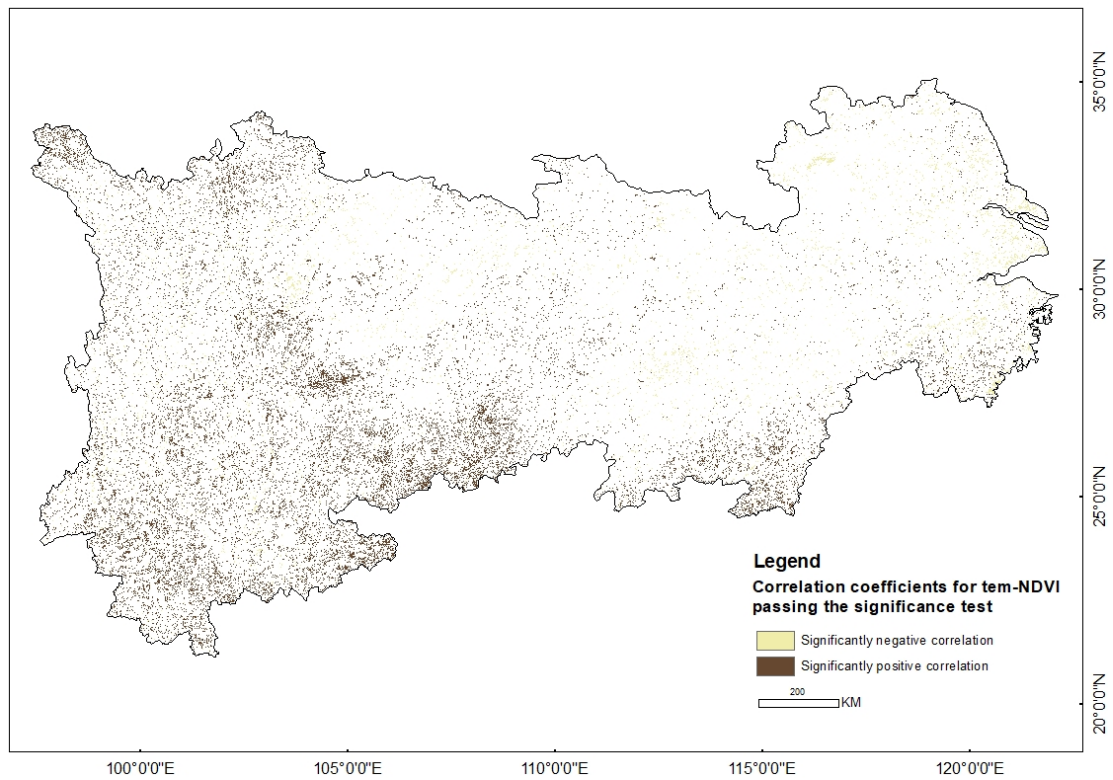

**Figure S9.** Correlation coefficients of tem-NDVI passing the significance test (2000-2020).

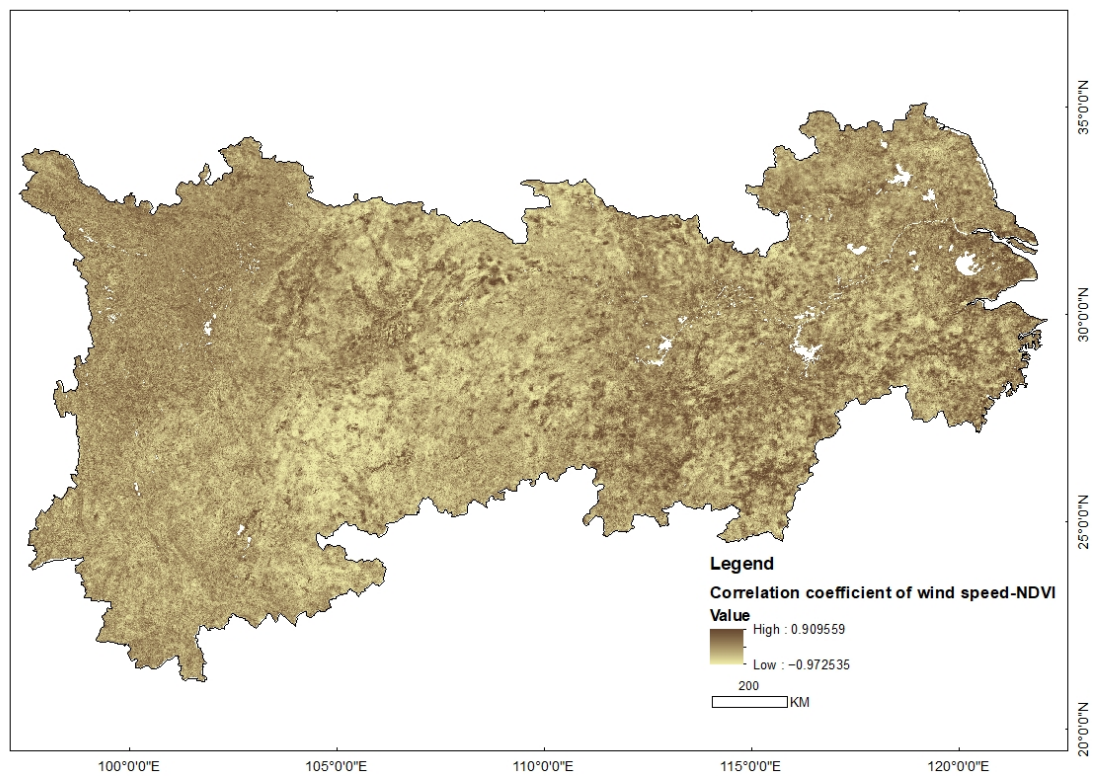

**Figure S10.** Correlation coefficients of wind speed-NDVI (2000-2020).



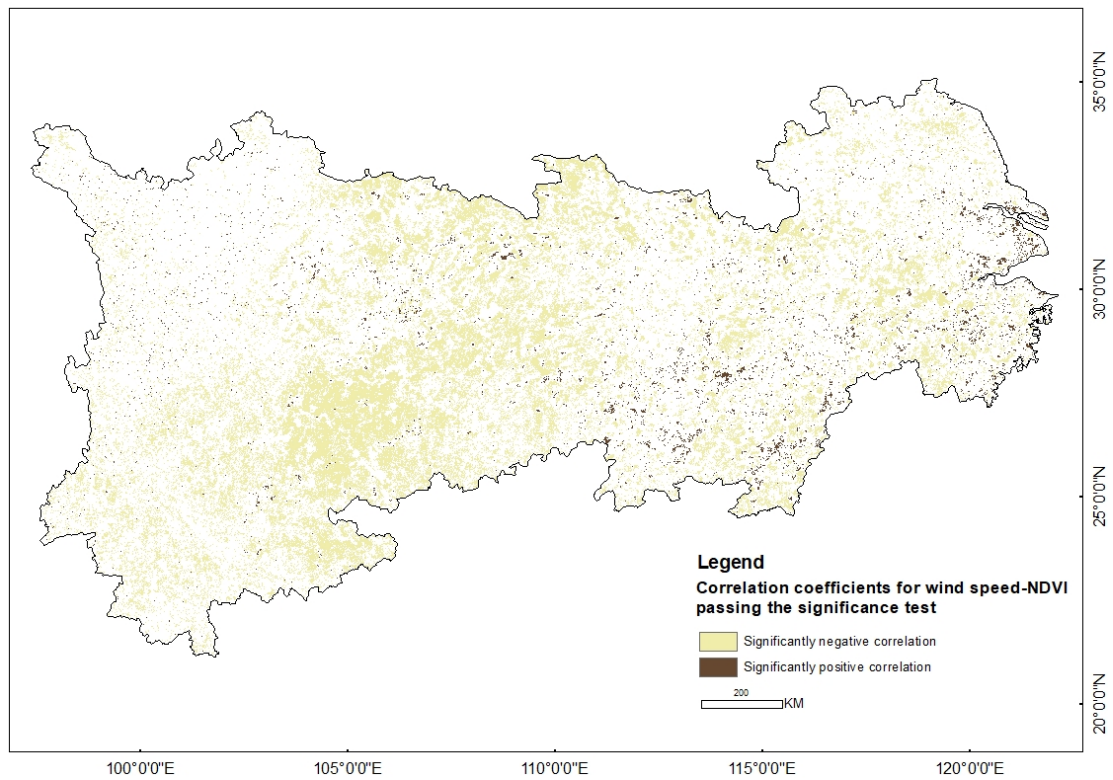

**Figure S11.** Correlation coefficients of wind speed-NDVI passing the significance test (2000-2020).

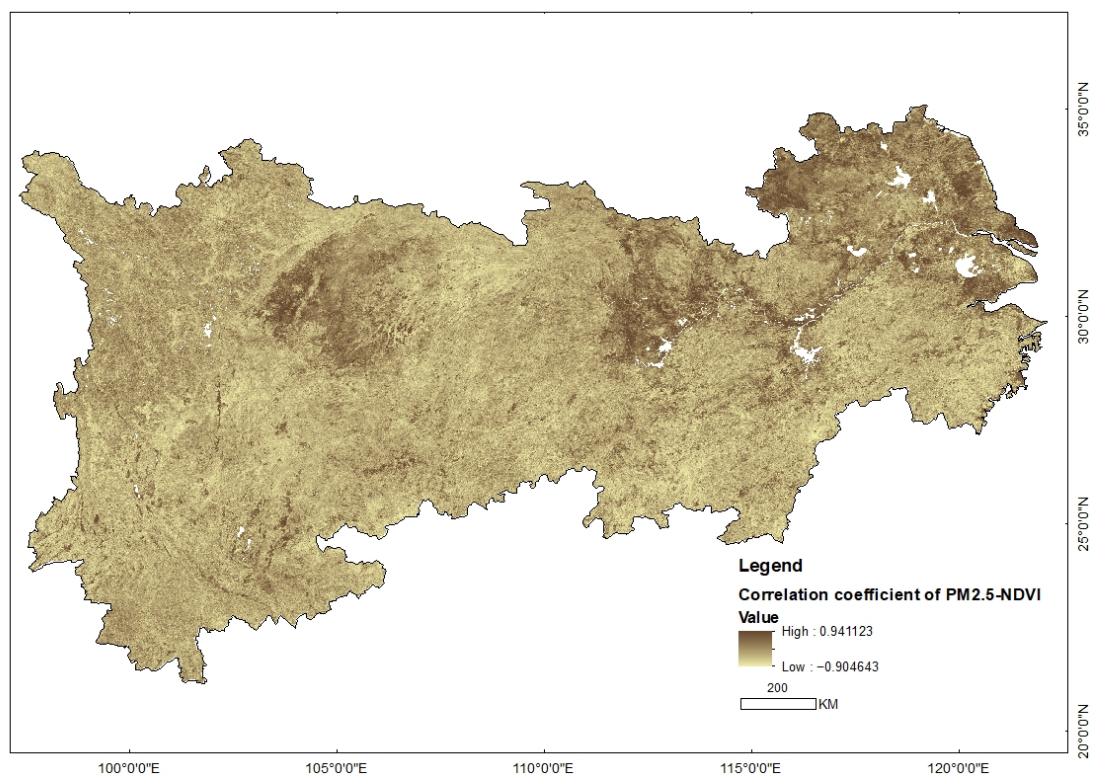

**Figure S12.** Correlation coefficients of PM2.5-NDVI (2000-2020).

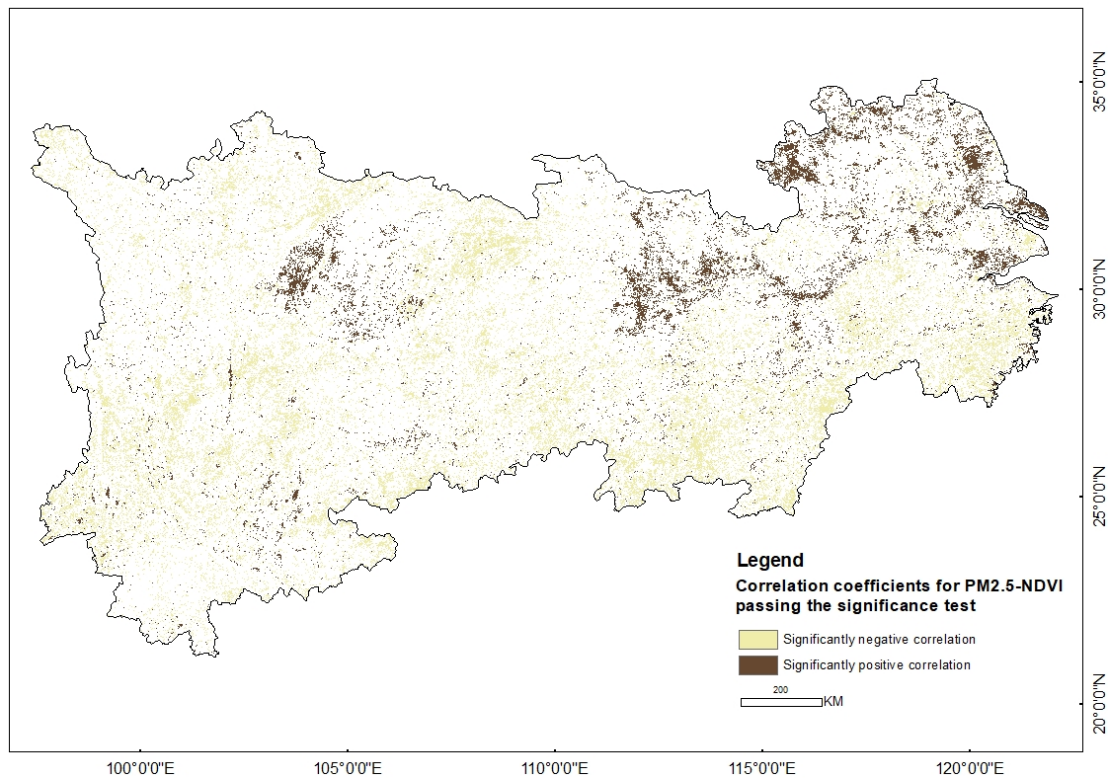

**Figure S13.** Correlation coefficients of PM2.5-NDVI passing the significance test (2000-2020).

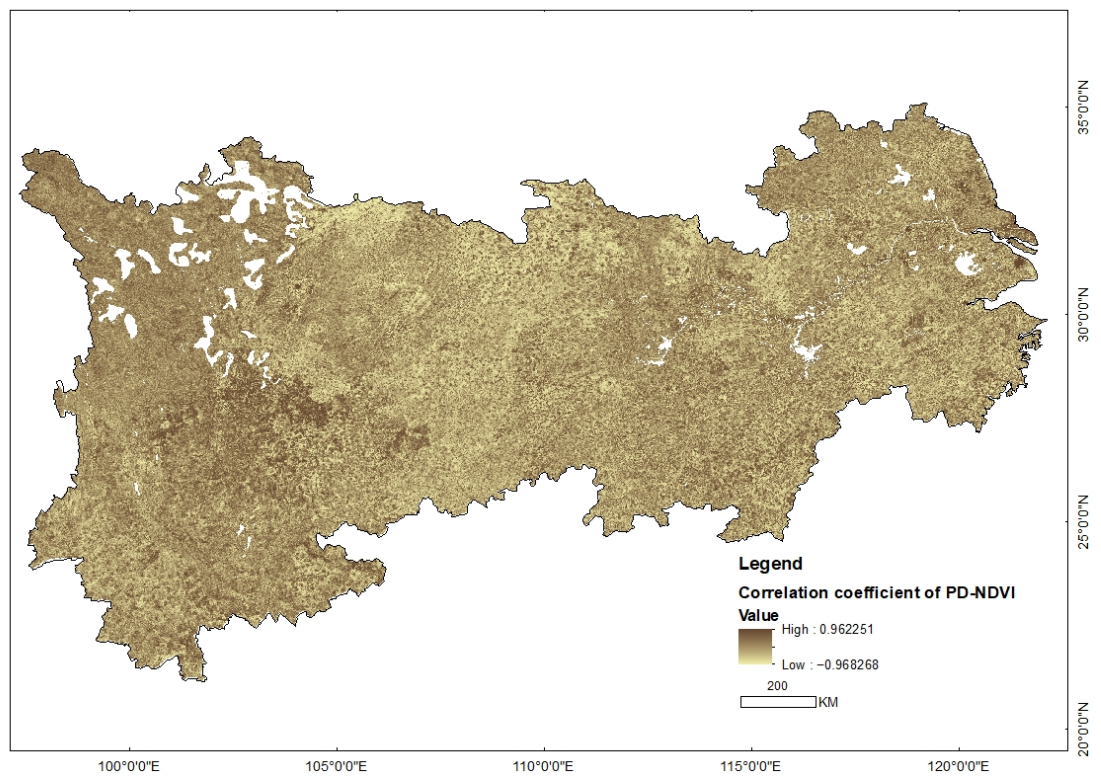

**Figure S14.** Correlation coefficients of PD-NDVI (2000-2020).



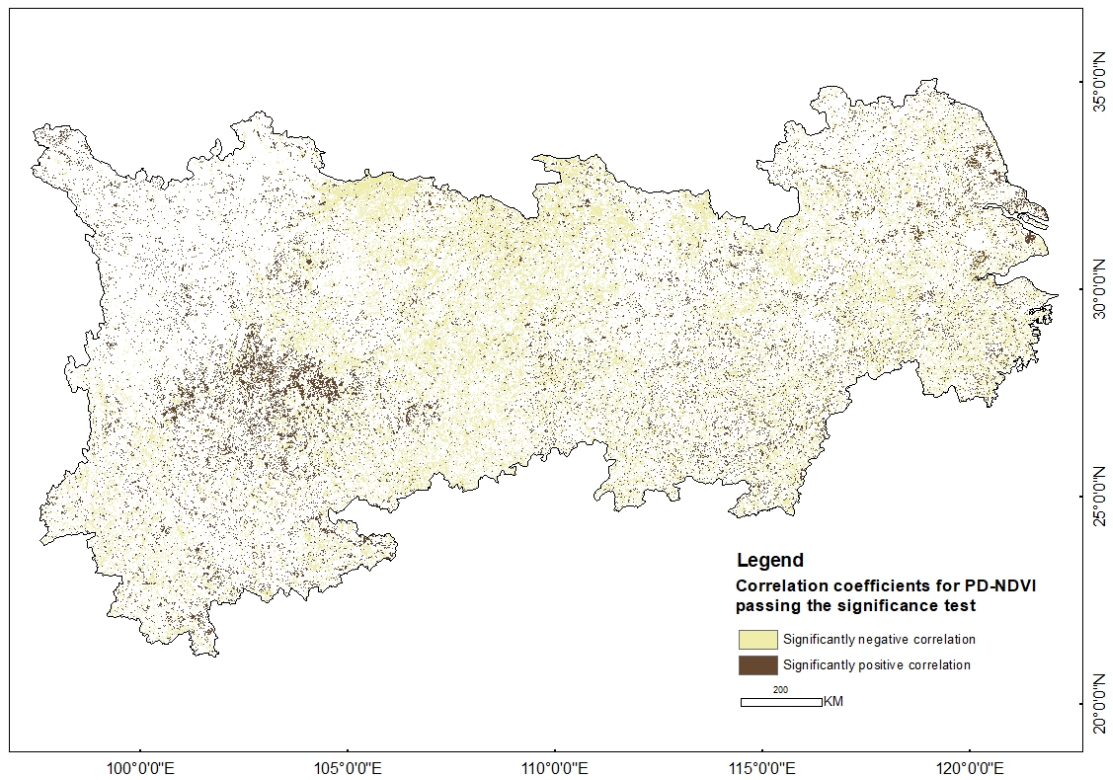

**Figure S15.** Correlation coefficients of PD-NDVI passing the significance test (2000-2020).

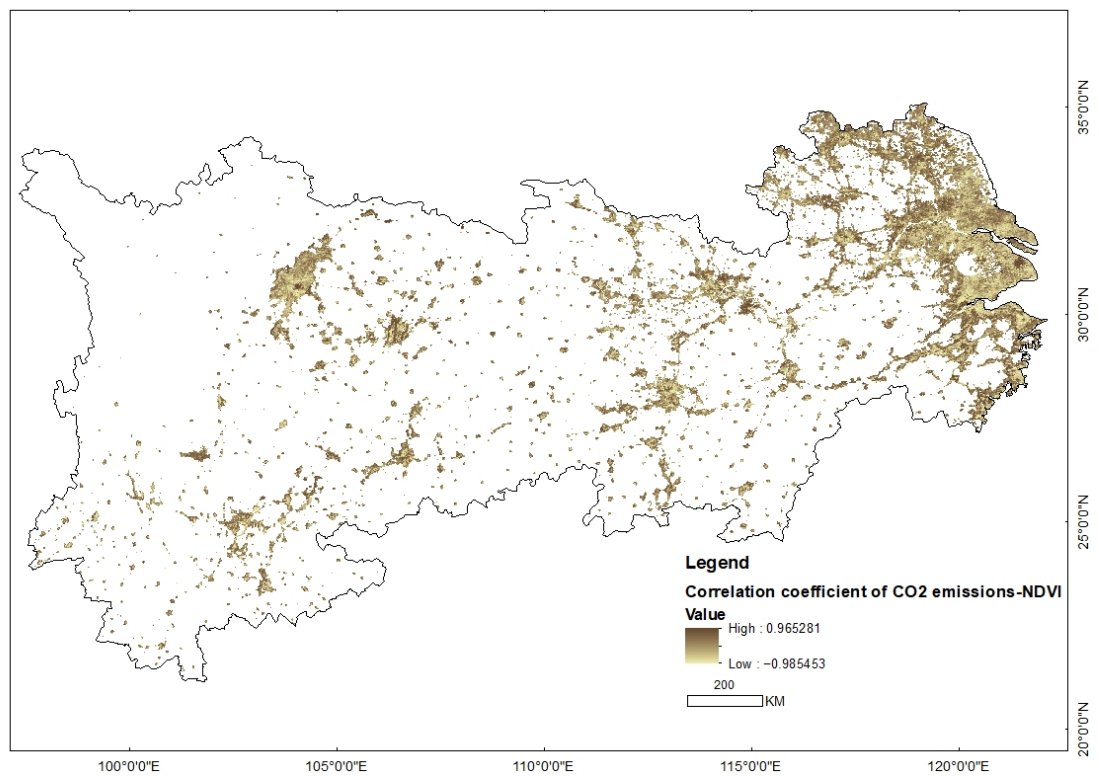

**Figure S16.** Correlation coefficients of CO<sub>2</sub> emissions -NDVI (2000-2020).

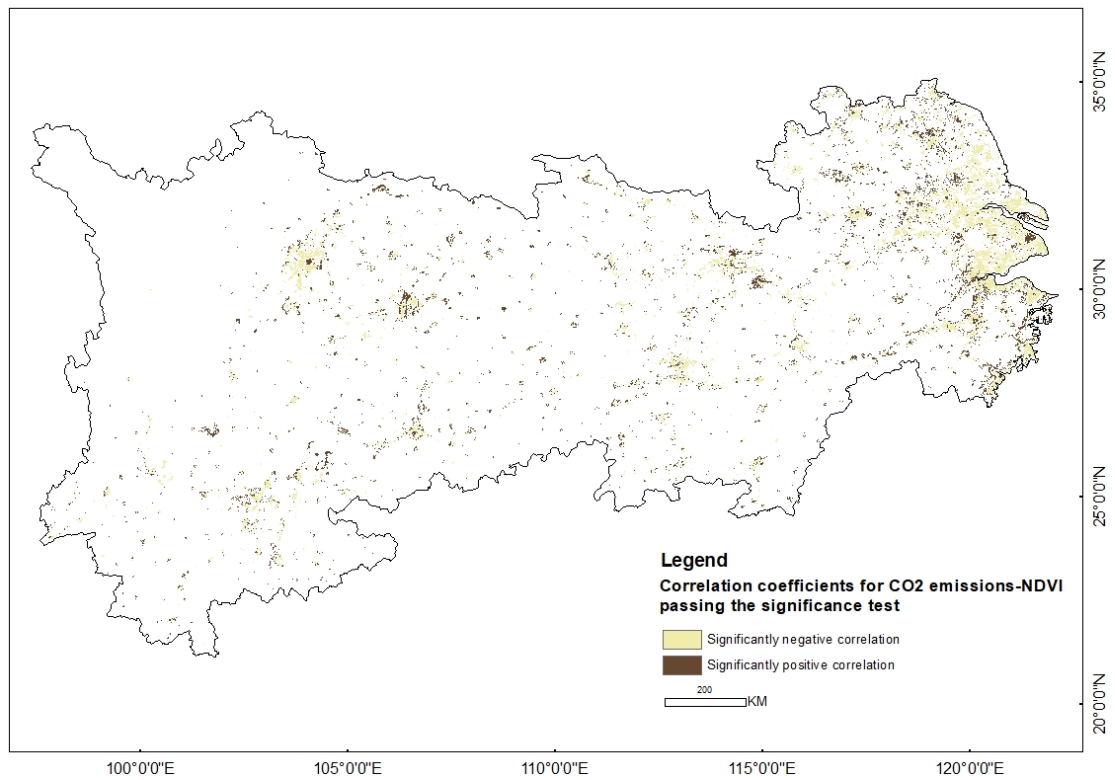

**Figure S17.** Correlation coefficients of CO<sub>2</sub> emissions -NDVI passing the significance test (2000-2020).

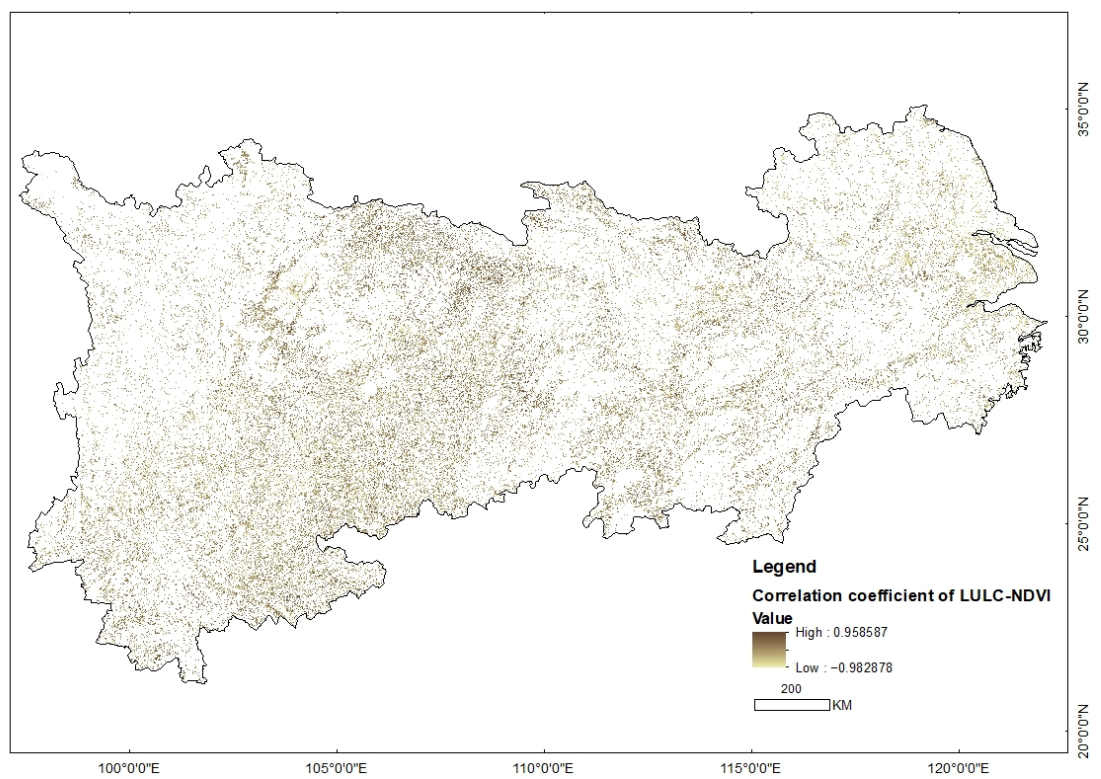

**Figure S18.** Correlation coefficients of LULC -NDVI (2000-2020).

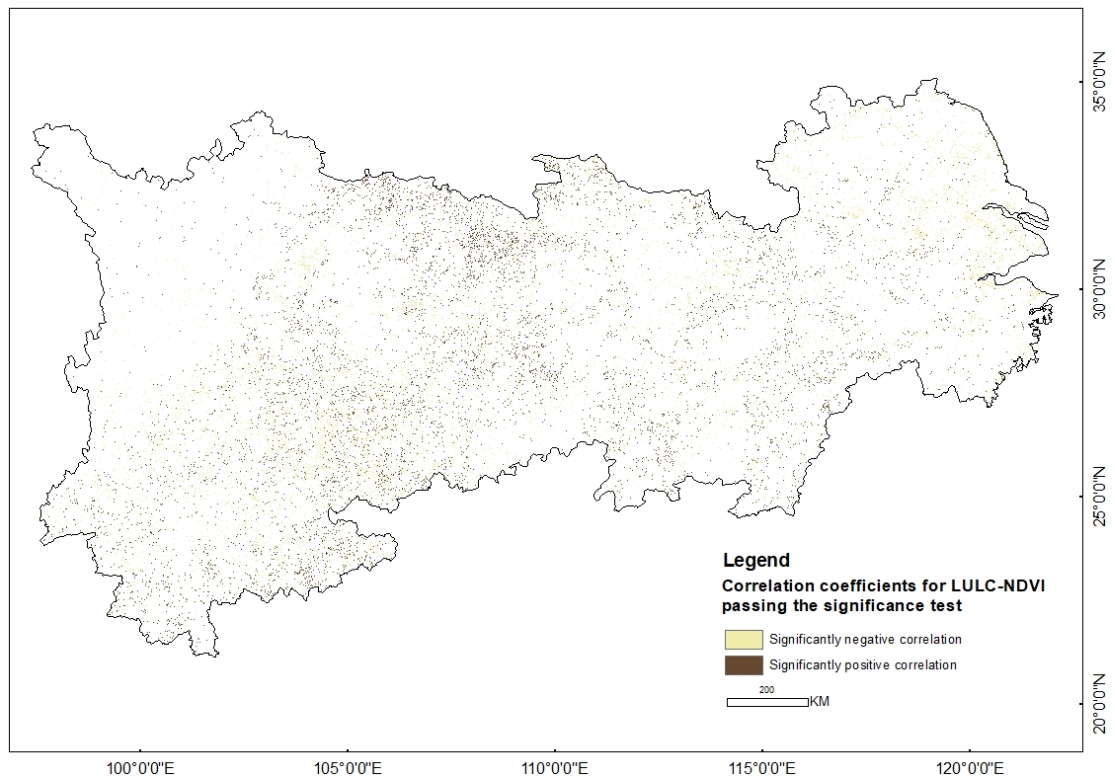

**Figure S19.** Correlation coefficients of LULC -NDVI passing the significance test (2000-2020).
